# Supplementary material
Source: MDPI journal article supplement (https://www.mdpi.com/2072-4292/13/18/3654)
Supplement: s1 [file s1]

## Review

# Understanding the Links between LULC Changes and SUHI in Cities: Insights from Two-Decadal Studies (2001–2020)

Ahmed Derdouri <sup>1</sup>, Ruci Wang <sup>2,\*</sup>, Yuji Murayama <sup>2</sup> and Toshihiro Osaragi <sup>1</sup>

**Citation:** Derdouri, A.; Wang, R.; Murayama, Y.; Osaragi, T. Understanding the Links between LULC Changes and SUHI in Cities: Insights from Two-Decadal Studies (2001–2020). *Remote Sens.* **2021**, *13*, 3654. <https://doi.org/10.3390/rs13183654>

<sup>1</sup> School of Environment and Society, Tokyo Institute of Technology, 2 Chome-12-1 Ookayama, Meguro City, Tokyo 152-8550, Japan; derdouri.a.aa@m.titech.ac.jp (A.D.); osaragi.a.aa@m.titech.ac.jp (T.O.)

<sup>2</sup> Faculty of Life and Environmental Science, University of Tsukuba, 1-1-1 Tennodai, Tsukuba City, Ibaraki 305-8572, Japan; wang.ruci.fw@u.tsukuba.ac.jp (R.W.); mura@geoenv.tsukuba.ac.jp (Y.M.)

\* Correspondence: wang.ruci.fw@u.tsukuba.ac.jp

Academic Editor: Zina Mitraka

Received: 11 August 2021

Accepted: 10 September 2021

Published: 13 September 2021

**Publisher's Note:** MDPI stays neutral with regard to jurisdictional claims in published maps and institutional affiliations.

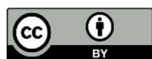

**Copyright:** © 2021 by the authors. Licensee MDPI, Basel, Switzerland. This article is an open access article distributed under the terms and conditions of the Creative Commons Attribution (CC BY) license (<http://creativecommons.org/licenses/by/4.0/>).

**Table S1.** Descriptive list of reviewed literature sorted chronologically based on year of publication.

|   | <b>Author(s)<br/>&amp; YoP</b> | <b>Title</b>                                                                                                                                       | <b>Study Area</b>                         | <b>Climate</b>     | <b>Data<br/>Sources</b>       | <b>Factors Contributing to<br/>SUHI</b>                                                                                 |
|---|--------------------------------|----------------------------------------------------------------------------------------------------------------------------------------------------|-------------------------------------------|--------------------|-------------------------------|-------------------------------------------------------------------------------------------------------------------------|
| 1 | Lo and Quattrochi 2003         | Land-use and land-cover change, urban heat island phenomenon, and health implications                                                              | Atlanta<br>United States<br>North America | Temperate<br>(Cfa) | Landsat (MSS & TM)            | Inter-annual variations; Seasonal variations; LULC types; LULC patterns; Biophysical; Topography; Socioeconomic; Others |
| 2 | Chen et al. 2006               | Remote sensing image-based analysis of the relationship between urban heat island and land use/cover changes                                       | Shenzhen<br>China<br>Asia                 | Temperate<br>(Cwa) | Landsat (TM & ETM+)<br>IKONOS | Inter-annual variations; Seasonal variations; LULC types; LULC patterns; Biophysical; PDENS; Others                     |
| 3 | Zhang et al. 2009              | Bi-temporal characterization of land surface temperature in relation to impervious surface area, NDVI and NDBI, using a sub-pixel image analysis   | Fuzhou<br>China<br>Asia                   | Temperate<br>(Cfa) | Landsat (TM & ETM+)<br>IKONOS | Inter-annual variations; Seasonal variations; LULC types; LULC patterns; Biophysical                                    |
| 4 | Kant et al. 2009               | Satellite-based analysis of the role of land use/land cover and vegetation density on surface temperature regime of Delhi, India                   | Delhi<br>India<br>Asia                    | Arid<br>(BSh)      | ASTER                         | Inter-annual variations; Day/Night variations; LULC types; LULC patterns                                                |
| 5 | Amiri et al. 2009              | Spatial-temporal dynamics of land surface temperature in relation to fractional vegetation cover and land use/cover in the Tabriz urban area, Iran | Tabriz<br>Iran<br>Asia                    | Arid<br>(BSk)      | Landsat (TM & ETM+)           | Inter-annual variations; LULC types; LULC patterns                                                                      |
| 6 | Li et al. 2009                 | Remote sensing evaluation of urban heat island and its spatial pattern of the Shanghai metropolitan area, China                                    | Shanghai<br>China<br>Asia                 | Temperate<br>(Cfa) | Landsat (TM)                  | Inter-annual variations; Seasonal variations; LULC types; LULC patterns; Biophysical; Landscape                         |
| 7 | Hu and Jia 2010                | Influence of land use change on urban heat island derived from multi-sensor data                                                                   | Guangzhou<br>China<br>Asia                | Temperate<br>(Cwa) | Landsat (TM & ETM+)<br>MODIS  | Inter-annual variations; LULC types; LULC patterns; Biophysical                                                         |

|    |                                     |                                                                                                                                     |                                                      |                      |                                |                                                                                                                               |
|----|-------------------------------------|-------------------------------------------------------------------------------------------------------------------------------------|------------------------------------------------------|----------------------|--------------------------------|-------------------------------------------------------------------------------------------------------------------------------|
| 8  | Cai et al.<br>2011                  | Monitoring of urban heat island effect in Beijing combining ASTER and TM data                                                       | Beijing<br>China<br>Asia                             | Continental<br>(Dwa) | Landsat (TM)<br>ASTER          | Inter-annual variations; Seasonal variations; LULC types; LULC patterns                                                       |
| 9  | Li et al.<br>2011                   | Impacts of landscape structure on surface urban heat islands: A case study of Shanghai, China                                       | Shanghai<br>China<br>Asia                            | Temperate<br>(Cfa)   | Landsat<br>(ETM+)              | Inter-annual variations; Seasonal variations; LULC types; LULC patterns; Biophysical; PDENS; Socioeconomic; Landscape; Others |
| 10 | Zhou and Wang<br>2011               | Dynamics of Land Surface Temperature in Response to Land-Use/Cover Change                                                           | Kunming<br>China<br>Asia                             | Temperate<br>(Cwb)   | Landsat (TM)                   | Inter-annual variations; Seasonal variations; LULC types; LULC patterns; Biophysical                                          |
| 11 | Apolonio<br>Callejas et al.<br>2011 | Relationship between land use/cover and surface temperatures in the urban agglomeration of Cuiaba-Varzea Grande, Central Brazil     | Cuiaba &<br>Varzea Grande<br>Brazil<br>South America | Tropical<br>(Aw)     | Landsat (TM)<br>Quickbird      | Inter-annual variations; LULC types; LULC patterns                                                                            |
| 12 | Xiong et al.<br>2012                | The Impacts of Rapid Urbanization on the Thermal Environment: A Remote Sensing Study of Guangzhou, South China                      | Guangzhou<br>China<br>Asia                           | Temperate<br>(Cwa)   | Landsat (TM<br>& ETM+)<br>SPOT | Inter-annual variations; Seasonal variations; LULC types; LULC patterns; Biophysical; PDENS; Socioeconomic                    |
| 13 | Li et al.<br>2012                   | Monitoring patterns of urban heat islands of the fast-growing Shanghai metropolis, China: Using time-series of Landsat TM/ETM+ data | Shanghai<br>China<br>Asia                            | Temperate<br>(Cfa)   | Landsat (TM<br>& ETM+)         | Inter-annual variations; Seasonal variations; LULC types; LULC patterns; Biophysical; PDENS; Others                           |
| 14 | Chen et al.<br>2012                 | The influence of socioeconomic and topographic factors on nocturnal urban heat islands: A case study in Shenzhen, China             | Shenzhen<br>China<br>Asia                            | Temperate<br>(Cwa)   | Landsat (TM)<br>ASTER          | Day/Night variations; LULC types; LULC patterns; Topography; PDENS; Others                                                    |
| 15 | Cui and Shi<br>2012                 | Urbanization and its environmental effects in Shanghai, China                                                                       | Shanghai<br>China<br>Asia                            | Temperate<br>(Cfa)   | MODIS                          | Inter-annual variations; Seasonal variations; LULC types; LULC patterns; Biophysical; PDENS; Socioeconomic; Others            |

|    |                           |                                                                                                                                                                                            |                                           |                      |                               |                                                                                                            |
|----|---------------------------|--------------------------------------------------------------------------------------------------------------------------------------------------------------------------------------------|-------------------------------------------|----------------------|-------------------------------|------------------------------------------------------------------------------------------------------------|
| 16 | Dobrovolný<br>2013        | The surface urban heat island in the city of Brno (Czech Republic) derived from land surface temperatures and selected reasons for its spatial variability                                 | Brno<br>Czech Republic<br>Europe          | Continental<br>(Dfb) | Landsat (TM & ETM+)           | Inter-annual variations; LULC types; LULC patterns; Biophysical; Topography; PDENS; Socioeconomic; Others  |
| 17 | Meng and Liu<br>2013      | Remote-sensing image-based analysis of the patterns of urban heat islands in rapidly urbanizing Jinan, China                                                                               | Jinan<br>China<br>Asia                    | Continental<br>(Dwa) | Landsat (TM & ETM+)           | Inter-annual variations; Seasonal variations; LULC types; LULC patterns; Biophysical; PDENS; Socioeconomic |
| 18 | Mallick et al.<br>2013    | Modeling urban heat islands in heterogeneous land surface and its correlation with impervious surface area by using night-time ASTER satellite data in highly urbanizing city, Delhi-India | Delhi<br>India<br>Asia                    | Arid<br>(BSh)        | Landsat (ETM+) ASTER          | Inter-annual variations; Day/Night variations; LULC types; LULC patterns; PDENS                            |
| 19 | Zhang et al.<br>2013      | Analysis of land use/land cover change, population shift, and their effects on spatiotemporal patterns of urban heat islands in metropolitan Shanghai, China                               | Shanghai<br>China<br>Asia                 | Temperate<br>(Cfa)   | Landsat (TM & ETM+)           | Inter-annual variations; Seasonal variations; LULC types; LULC patterns; PDENS; Others                     |
| 20 | Lucena et al.<br>2013     | Urban climate and clues of heat island events in the metropolitan area of Rio de Janeiro                                                                                                   | Rio de Janeiro<br>Brazil<br>South America | Tropical<br>(Am)     | Landsat (TM)                  | Inter-annual variations; LULC types; LULC patterns                                                         |
| 21 | Ding and Shi<br>2013      | Land-use/land-cover change and its influence on surface temperature: a case study in Beijing City                                                                                          | Beijing<br>China<br>Asia                  | Continental<br>(Dwa) | Landsat (TM & ETM+) Quickbird | Inter-annual variations; Seasonal variations; LULC types; LULC patterns                                    |
| 22 | Senanayake et al.<br>2013 | Remote sensing based analysis of urban heat islands with vegetation cover in Colombo city, Sri Lanka using Landsat-7 ETM+ data                                                             | Colombo<br>Sri Lanka<br>Asia              | Tropical<br>(Af)     | Landsat (ETM+)                | Inter-annual variations; Seasonal variations; LULC types; LULC patterns; Biophysical; Others               |
| 23 | Sharma and Joshi<br>2014  | Identifying seasonal heat islands in urban settings of Delhi (India) using remotely sensed data - An anomaly based approach                                                                | Delhi<br>India<br>Asia                    | Arid<br>(BSh)        | Landsat (TM)                  | Inter-annual variations; Seasonal variations; LULC types; LULC patterns                                    |
| 24 | Wu et al.<br>2014         | Assessing the effects of land use spatial structure on urban heatislands using HJ-                                                                                                         | Wuhan<br>China<br>Asia                    | Temperate<br>(Cfa)   | HJ-1B                         | Inter-annual variations; LULC types; LULC patterns; Biophysical; Landscape; Others                         |

| 1B remote sensing imagery in Wuhan, China |                       |                                                                                                                                                 |                                    |                      |                          |                                                                                                 |
|-------------------------------------------|-----------------------|-------------------------------------------------------------------------------------------------------------------------------------------------|------------------------------------|----------------------|--------------------------|-------------------------------------------------------------------------------------------------|
| 25                                        | Effat and Hassan 2014 | Change detection of urban heat islands and some related parameters using multi-temporal Landsat images; a case study for Cairo city, Egypt      | Cairo<br>Egypt<br>Africa           | Arid<br>(BWh)        | Landsat (TM & ETM+)      | Inter-annual variations; LULC types; LULC patterns; Biophysical; Others                         |
| 26                                        | Yusuf et al. 2014     | Spatio-temporal Assessment of Urban Heat Island Effects in Kuala Lumpur Metropolitan City Using Landsat Images                                  | Kuala Lumpur<br>Malaysia<br>Asia   | Tropical<br>(Af)     | Landsat (TM & ETM+)      | Inter-annual variations; LULC types; LULC patterns; Biophysical                                 |
| 27                                        | Singh et al. 2014     | Inter-seasonal variations of surface temperature in the urbanized environment of Delhi using landsat thermal data                               | Delhi<br>India<br>Asia             | Arid<br>(BSh)        | Landsat (TM)             | Inter-annual variations; Seasonal variations; LULC types; LULC patterns; Landscape              |
| 28                                        | Feng et al. 2014      | Using land use change trajectories to quantify the effects of urbanization on urban heat island                                                 | Xiamen<br>China<br>Asia            | Temperate<br>(Cfa)   | Landsat (TM & ETM+)      | Inter-annual variations; LULC types; LULC patterns; Others                                      |
| 29                                        | Li et al. 2014        | Impact of land cover and population density on land surface temperature: case study in Wuhan, China                                             | Wuhan<br>China<br>Asia             | Temperate<br>(Cfa)   | Landsat (TM)             | Inter-annual variations; LULC types; LULC patterns; Biophysical; PDENS                          |
| 30                                        | Odindi et al. 2015    | Assessing the value of urban green spaces in mitigating multi-seasonal urban heat using MODIS land surface temperature (LST) and landsat 8 data | Ethekwini<br>SouthAfrica<br>Africa | Temperate<br>(Cfa)   | Landsat (TIRS/OLI) MODIS | Inter-annual variations; Seasonal variations; LULC types; LULC patterns; Biophysical; Landscape |
| 31                                        | Lu et al. 2015        | The Effect of Urban Expansion on Urban Surface Temperature in Shenyang, China: an Analysis with Landsat Imagery                                 | Shenyang<br>China<br>Asia          | Continental<br>(Dwa) | Landsat (TM & ETM+)      | Inter-annual variations; LULC types; LULC patterns                                              |
| 32                                        | Rasul et al. 2015     | Spatial variation of the daytime Surface Urban Cool Island during the dry season in Erbil, Iraqi Kurdistan, from Landsat 8                      | Erbil<br>Iraq<br>Asia              | Temperate<br>(Csa)   | Landsat (TIRS/OLI)       | Inter-annual variations; LULC types; LULC patterns; Biophysical                                 |

|    |                           |                                                                                                                                                              |                                           |                      |                                  |                                                                                                     |
|----|---------------------------|--------------------------------------------------------------------------------------------------------------------------------------------------------------|-------------------------------------------|----------------------|----------------------------------|-----------------------------------------------------------------------------------------------------|
| 33 | Rotem-Mindali et al. 2015 | The role of local land-use on the urban heat island effect of Tel Aviv as assessed from satellite remote sensing                                             | Tel Aviv<br>Israel<br>Asia                | Temperate<br>(Csa)   | Landsat<br>MODIS                 | Inter-annual variations; LULC types; LULC patterns; Biophysical                                     |
| 34 | Wang et al. 2016          | Spatio-temporal modeling of the urban heat island in the Phoenix metropolitan area: Land use change implications                                             | Phoenix<br>United States<br>North America | Arid<br>(BWh)        | Landsat (TM & TIRS/OLI)<br>MODIS | Inter-annual variations; LULC types; LULC patterns; Biophysical                                     |
| 35 | Amanollahi et al. 2016    | Urban heat evolution in a tropical area utilizing Landsat imagery                                                                                            | Kuala Lumpur<br>Malaysia<br>Asia          | Tropical<br>(Af)     | Landsat (TM & ETM+)              | Inter-annual variations; LULC types; LULC patterns; Topography; Others                              |
| 36 | Cai et al. 2016           | Quantifying the Impact of Land use/Land Cover Changes on the Urban Heat Island: A Case Study of the Natural Wetlands Distribution Area of Fuzhou City, China | Fuzhou<br>China<br>Asia                   | Temperate<br>(Cfa)   | Landsat (TM)                     | Inter-annual variations; LULC types; LULC patterns; Biophysical; PDENS; Others                      |
| 37 | Kikon et al. 2016         | Assessment of urban heat islands (UHI) of Noida City, India using multi-temporal satellite data                                                              | Noida<br>India<br>Asia                    | Arid<br>(BSh)        | Landsat (ETM+ & TIRS/OLI)        | Inter-annual variations; LULC types; LULC patterns; Biophysical; Others                             |
| 38 | Deilami et al. 2016       | Correlation or causality between land cover patterns and the urban heat island effect? Evidence from Brisbane, Australia                                     | Brisbane<br>Australia<br>Oceania          | Temperate<br>(Cfa)   | Landsat (TM & TIRS/OLI)          | Inter-annual variations; Seasonal variations; LULC types; LULC patterns; Biophysical; PDENS; Others |
| 39 | Chen et al. 2016          | Surface Heat Island in Shanghai and Its Relationship with Urban Development from 1989 to 2013                                                                | Shanghai<br>China<br>Asia                 | Temperate<br>(Cfa)   | Landsat (TM & TIRS/OLI)          | Inter-annual variations; LULC types; LULC patterns; Biophysical                                     |
| 40 | Fu and Weng 2016          | A time series analysis of urbanization induced land use and land cover change and its impact on land surface temperature with Landsat imagery                | Atlanta<br>USA<br>North America           | Temperate<br>(Cfa)   | Landsat (TM & ETM+)              | Inter-annual variations; Seasonal variations; LULC types; LULC patterns                             |
| 41 | Yang et al. 2017          | Mapping the influence of land use/land cover changes on the urban heat island effect-A case study of Changchun, China                                        | Changchun<br>China<br>Asia                | Continental<br>(Dwa) | Landsat (TM & TIRS/OLI)<br>GF-1  | Inter-annual variations; LULC types; LULC patterns; Biophysical                                     |

|    |                           |                                                                                                                                                                 |                              |                      |                                      |                                                                                                            |
|----|---------------------------|-----------------------------------------------------------------------------------------------------------------------------------------------------------------|------------------------------|----------------------|--------------------------------------|------------------------------------------------------------------------------------------------------------|
| 42 | Tran et al.<br>2017       | Characterizing the relationship between land use land cover change and land surface temperature                                                                 | Hanoi<br>Vietnam<br>Asia     | Temperate<br>(Cwa)   | Landsat (TM & ETM+)                  | Inter-annual variations; LULC types; LULC patterns; Biophysical; Others                                    |
| 43 | Majkowska et al.<br>2017  | The urban heat island in the city of Poznań as derived from Landsat 5 TM                                                                                        | Poznań<br>Poland<br>Europe   | Continental<br>(Dfb) | Landsat (TM)                         | Inter-annual variations; LULC types; LULC patterns; Biophysical; Socioeconomic                             |
| 44 | Hereher<br>2017           | Retrieving spatial variations of land surface temperatures from satellite data—Cairo region, Egypt                                                              | Cairo<br>Egypt<br>Africa     | Arid<br>(BWh)        | Landsat (TIRS/OLI)<br>MODIS          | Inter-annual variations; LULC types; LULC patterns; Biophysical; Topography; Socioeconomic                 |
| 45 | Pal and Ziaul<br>2017     | Detection of land use and land cover change and land surface temperature in English Bazar urban centre                                                          | Malda<br>India<br>Asia       | Temperate<br>(Cwa)   | Landsat (TM & ETM+)                  | Inter-annual variations; Seasonal variations; LULC types; LULC patterns; Biophysical                       |
| 46 | Sannigrahi et al.<br>2017 | Changing dynamics of urban biophysical composition and its impact on urban heat island intensity and thermal characteristics: the case of Hyderabad City, India | Hyderabad<br>India<br>Asia   | Arid<br>(BSh)        | Landsat (TM & ETM+)                  | Inter-annual variations; LULC types; LULC patterns; Biophysical                                            |
| 47 | X. Zhang et al.<br>2017   | An urban heat island study in Nanchang City, China based on land surface temperature and social-ecological variables                                            | Nanchang<br>China<br>Asia    | Temperate<br>(Cfa)   | Landsat (TM & TIRS/OLI)              | Inter-annual variations; LULC types; LULC patterns; Biophysical; PDENS; Socioeconomic                      |
| 48 | Guha et al.<br>2017       | Dynamic analysis and ecological evaluation of urban heat islands in Raipur city, India                                                                          | Raipur<br>India<br>Asia      | Tropical<br>(Aw)     | Landsat (TM & TIRS/OLI)<br>MODIS     | Inter-annual variations; LULC types; LULC patterns; Biophysical                                            |
| 49 | Wang et al.<br>2017       | Surface urban heat island analysis of shanghai (China) based on the change of land use and land cover                                                           | Shanghai<br>China<br>Asia    | Temperate<br>(Cfa)   | Landsat (TM & TIRS/OLI)<br>QuickBird | Inter-annual variations; LULC types; LULC patterns; Biophysical                                            |
| 50 | Swain et al.<br>2017      | Impact of Rapid Urbanization on the City of Bhubaneswar, India                                                                                                  | Bhubaneswar<br>India<br>Asia | Tropical<br>(Aw)     | Landsat (ETM+ & TIRS/OLI)<br>MODIS   | Inter-annual variations; Seasonal variations; Day/Night variations; LULC types; LULC patterns; Biophysical |

|    |                                   |                                                                                                                                                                      |                                              |                                                         |                                          |                                                                                        |
|----|-----------------------------------|----------------------------------------------------------------------------------------------------------------------------------------------------------------------|----------------------------------------------|---------------------------------------------------------|------------------------------------------|----------------------------------------------------------------------------------------|
| 51 | Singh et al.<br>2017              | Impact of land use change and urbanization on urban heat island in Lucknow city, Central India. A remote sensing based estimate                                      | Lucknow<br>India<br>Asia                     | Temperate<br>(Cwa)                                      | Landsat (TM<br>& TIRS/OLI)               | Inter-annual variations; LULC types; LULC patterns; Biophysical                        |
| 52 | Fan et al.<br>2017                | Understanding the Impact of Urbanization on Surface Urban Heat Islands-A Longitudinal Analysis of the Oasis Effect in Subtropical Desert Cities                      | 5 Arid cities<br>5 Countries<br>3 Continents | Arid<br>(BSh/BWk/BWh)                                   | Landsat (TM)                             | Inter-annual variations; LULC types; LULC patterns; Biophysical; Others                |
| 53 | Xinping Zhang et al.<br>2017      | Effects of Land Use/Cover Changes and Urban Forest Configuration on Urban Heat Islands in a Loess Hilly Region: Case Study Based on Yan'an City, China               | Yan'an<br>China<br>Asia                      | Continental<br>(Dwa)                                    | Landsat (TM, ETM+, & TIRS/OLI)<br>GeoEye | Inter-annual variations; LULC types; LULC patterns; Biophysical; Landscape             |
| 54 | Estoque and Murayama<br>2017      | Monitoring surface urban heat island formation in a tropical mountain city using Landsat data (1987–2015)                                                            | Baguio<br>Philippines<br>Asia                | Tropical<br>(Am)                                        | Landsat (TM, ETM+, & TIRS/OLI)           | Inter-annual variations; LULC types; LULC patterns; Biophysical; Topography; Landscape |
| 55 | Ranagalage et al.<br>2017         | An urban heat island study of the Colombo Metropolitan Area, Sri Lanka, based on Landsat data (1997-2017)                                                            | Colombo<br>Sri Lanka<br>Asia                 | Tropical<br>(Af)                                        | Landsat (TM & TIRS/OLI)                  | Inter-annual variations; LULC types; LULC patterns; Biophysical                        |
| 56 | Ranagalage et al.<br>2018         | Quantifying surface urban heat island formation in the world heritage tropical mountain city of Sri Lanka                                                            | Kandy<br>Sri Lanka<br>Asia                   | Tropical<br>(Af)                                        | Landsat (TM & TIRS/OLI)                  | Inter-annual variations; LULC types; LULC patterns; Biophysical                        |
| 57 | Sultana and Satyanarayana<br>2018 | Urban heat island intensity during winter over metropolitan cities of India using remote-sensing techniques: impact of urbanization                                  | Multiple cities<br>India<br>Asia             | Tropical<br>(Am/Aw)<br>Arid (BSh/BWh)<br>Temperate(Cwa) | Landsat<br>(ETM+)                        | Inter-annual variations; LULC types; LULC patterns; Biophysical                        |
| 58 | Rousta et al.<br>2018             | Spatiotemporal analysis of land use/land cover and its effects on surface urban heat Island using landsat data: A case study of Metropolitan City Tehran (1988-2018) | Tehran<br>Iran<br>Asia                       | Arid<br>(BSk)                                           | Landsat (TM & TIRS/OLI)                  | Inter-annual variations; LULC types; LULC patterns; Biophysical                        |
| 59 | Lin et al.<br>2018                | Urbanization effect on spatiotemporal thermal patterns and changes in Hangzhou (China)                                                                               | Hangzhou<br>China<br>Asia                    | Temperate<br>(Cfa)                                      | Landsat (TM)                             | Inter-annual variations; LULC types; LULC patterns; Biophysical; Landscape             |



|    |                            |                                                                                                                                                              |                                           |                                                        |                                   |                                                                                                                                    |
|----|----------------------------|--------------------------------------------------------------------------------------------------------------------------------------------------------------|-------------------------------------------|--------------------------------------------------------|-----------------------------------|------------------------------------------------------------------------------------------------------------------------------------|
| 60 | El-Hattab et al.<br>2018   | Monitoring and assessment of urban heat islands over the Southern region of Cairo Governorate, Egypt                                                         | Cairo<br>Egypt<br>Africa                  | Arid<br>(BWh)                                          | Landsat (TM, ETM+, & TIRS/OLI)    | Inter-annual variations; LULC types; LULC patterns; Biophysical; Others                                                            |
| 61 | Hoan et al.<br>2018        | Assessing the effects of land-use types in surface urban heat islands for developing comfortable living in Hanoi City                                        | Hanoi<br>Vietnam<br>Asia                  | Temperate<br>(Cwa)                                     | Landsat (TIRS/OLI)                | Inter-annual variations; LULC types; LULC patterns                                                                                 |
| 62 | Yu et al.<br>2018          | Variations in land surface temperature and cooling efficiency of green space in rapid urbanization: The case of Fuzhou city, China                           | Fuzhou<br>china<br>Asia                   | Temperate<br>(Cfa)                                     | Landsat (ETM+ & TIRS/OLI)<br>SPOT | Inter-annual variations; LULC types; LULC patterns                                                                                 |
| 63 | Kamruzzaman et al.<br>2018 | Investigating the urban heat island effect of transit oriented development in Brisbane                                                                       | Brisbane<br>Australia<br>Oceania          | Temperate<br>(Cfa)                                     | Landsat (TM & TIRS/OLI)<br>IKONOS | Inter-annual variations; LULC types; LULC patterns; PDENS; Others                                                                  |
| 64 | Peres et al.<br>2018       | The urban heat island in Rio de Janeiro, Brazil, in the last 30 years using remote sensing data                                                              | Rio de Janeiro<br>Brazil<br>South America | Tropical<br>(Am)                                       | Landsat (TM, ETM+, & TIRS/OLI)    | Inter-annual variations; LULC types; LULC patterns; Biophysical                                                                    |
| 65 | Rani et al.<br>2018        | Multi-temporal NDVI and surface temperature analysis for Urban Heat Island inbuilt surrounding of sub-humid region: A case study of two geographical regions | Haridwar & Kanpur<br>India<br>Asia        | Temperate<br>(Cwa)                                     | Landsat (ETM+)                    | Inter-annual variations; LULC types; LULC patterns; Biophysical                                                                    |
| 66 | Dihkan et al.<br>2018      | Evaluation of urban heat island effect in Turkey                                                                                                             | Multiple cities<br>Turkey<br>Asia         | Arid (BSk)<br>Temperate (Cfa/Csa)<br>Continental (Dfb) | Landsat (TM)<br>ASTER             | Inter-annual variations; Day/Night variations; LULC types; LULC patterns; Biophysical; Topography; PDENS; Socioeconomic; Landscape |
| 67 | Min et al.<br>2018         | Spatio-temporal evolution analysis of the urban heat island: A case study of Zhengzhou city, China                                                           | Zhengzhou<br>China<br>Asia                | Temperate<br>(Cwa)                                     | Landsat (TM & TIRS/OLI)           | Inter-annual variations; Seasonal variations; LULC types; LULC patterns; Biophysical; PDENS; Socioeconomic                         |

|    |                           |                                                                                                                                                                    |                                           |                      |                                        |                                                                                                    |
|----|---------------------------|--------------------------------------------------------------------------------------------------------------------------------------------------------------------|-------------------------------------------|----------------------|----------------------------------------|----------------------------------------------------------------------------------------------------|
| 68 | Silva et al.<br>2018      | Spatiotemporal impact of land use/land cover changes on urban heat islands: A case study of Paco do Lumiar, Brazil                                                 | Paço do Lumiar<br>Brazil<br>South America | Tropical<br>(Aw)     | Landsat (TM & TIRS/OLI)                | Inter-annual variations; Seasonal variations; LULC types; LULC patterns                            |
| 69 | Nguyen et al.<br>2019     | The environmental effects of urban development in Hanoi, Vietnam from satellite and meteorological observations from 1999-2016                                     | Hanoi<br>Vietnam<br>Asia                  | Temperate<br>(Cwa)   | Landsat (TM & TIRS/OLI)                | Inter-annual variations; LULC types; LULC patterns; Biophysical; Topography; Socioeconomic; Others |
| 70 | Chaka and Oda<br>2019     | Understanding land surface temperature on rift areas to examine the spatial variation of urban heat island: the case of Hawassa, southern Ethiopia                 | Hawassa<br>Ethiopia<br>Africa             | Temperate<br>(Csb)   | Landsat (TIRS/OLI)<br>MODIS            | Inter-annual variations; Day/Night variations; LULC types; LULC patterns; Biophysical; Others      |
| 71 | Padmanaban et al.<br>2019 | Satellite image fusion to detect changing surface permeability and emerging urban heat islands in a fast-growing city                                              | Tirunelveli<br>India<br>Asia              | Tropical<br>(Aw)     | Landsat (ETM+)<br>IRS LISS-III         | Inter-annual variations; LULC types; LULC patterns; Biophysical                                    |
| 72 | Huang et al.<br>2019      | Quantifying the seasonal contribution of coupling urban land use types on Urban Heat Island using Land Contribution Index: A case study in Wuhan, China            | Wuhan<br>China<br>Asia                    | Temperate<br>(Cfa)   | MODIS                                  | Inter-annual variations; Seasonal variations; LULC types; LULC patterns; Biophysical               |
| 73 | Guo et al.<br>2019        | Quantifying and simulating landscape composition and pattern impacts on land surface temperature: A decadal study of the rapidly urbanizing city of Beijing, China | Beijing<br>China<br>Asia                  | Continental<br>(Dwa) | Landsat (TM & TIRS/OLI)                | Inter-annual variations; LULC types; LULC patterns; Biophysical                                    |
| 74 | Dhar et al.<br>2019       | Impact of Land-Use/Land-Cover Change on Land Surface Temperature Using Satellite Data: A Case Study of Rajarhat Block, North 24-Parganas District, West Bengal     | Kolkata<br>India<br>Asia                  | Tropical<br>(Aw)     | Landsat (TM & TIRS/OLI)<br>Sentinel 2A | Inter-annual variations; LULC types; LULC patterns; Biophysical                                    |
| 75 | Ghosh et al.<br>2019      | Relation between urban biophysical composition and dynamics of land surface temperature in the Kolkata metropolitan                                                | Kolkata<br>India<br>Asia                  | Tropical<br>(Aw)     | Landsat                                | Inter-annual variations; LULC types; LULC patterns; Biophysical                                    |

| area: a GIS and statistical based analysis for sustainable planning |                            |                                                                                                                                                            |                                  |                                                |                                |                                                                                                                    |
|---------------------------------------------------------------------|----------------------------|------------------------------------------------------------------------------------------------------------------------------------------------------------|----------------------------------|------------------------------------------------|--------------------------------|--------------------------------------------------------------------------------------------------------------------|
| 76                                                                  | Bokaie et al. 2019         | Seasonal monitoring of urban heat island using multi-temporal Landsat and MODIS images in Tehran                                                           | Tehran<br>Iran<br>Asia           | Arid<br>(BSk)                                  | Landsat<br>MODIS<br>SPOT       | Inter-annual variations; Seasonal variations; LULC types; LULC patterns; Biophysical; Topography; Socioeconomic    |
| 77                                                                  | Lakra and Sharma 2019      | Geospatial Assessment of Urban Growth Dynamics and Land Surface Temperature in Ajmer Region, India                                                         | Ajmer<br>India<br>Asia           | Arid<br>(BSh)                                  | Landsat (TM & TIRS/OLI)        | Inter-annual variations; LULC types; LULC patterns; Biophysical; Topography                                        |
| 78                                                                  | Dissanayake et al. 2019    | Land-use/land-cover changes and their impact on surface urban heat islands: Case study of Kandy City, Sri Lanka                                            | Kandy<br>Sri Lanka<br>Asia       | Tropical<br>(Af)                               | Landsat (TM & TIRS/OLI)        | Inter-annual variations; LULC types; LULC patterns; Biophysical                                                    |
| 79                                                                  | Makinde and Agbor 2019     | Geoinformatic assessment of urban heat island and land use/cover processes: a case study from Akure                                                        | Akure<br>Nigeria<br>Africa       | Tropical<br>(Aw)                               | Landsat (TM, ETM+, & TIRS/OLI) | Inter-annual variations; LULC types; LULC patterns; Biophysical                                                    |
| 80                                                                  | Priyankara et al. 2019     | Spatial process of surface urban heat island in rapidly growing seoul metropolitan area for sustainable urban planning using landsat data (1996-2017)      | Seoul<br>Korea<br>Asia           | Continental<br>(Dwa)                           | Landsat (TM & TIRS/OLI)        | Inter-annual variations; LULC types; LULC patterns; Biophysical                                                    |
| 81                                                                  | Hu et al. 2019             | Comparison of surface and canopy urban heat islands within megacities of eastern China                                                                     | Multiple cities<br>China<br>Asia | Continental<br>(Dwa)<br>Temperate<br>(Cfa/Cwa) | MODIS                          | Inter-annual variations; Seasonal variations; Day/Night variations; LULC types; LULC patterns; Biophysical; Others |
| 82                                                                  | Karakuş 2019               | The Impact of Land Use/Land Cover (LULC) Changes on Land Surface Temperature in Sivas City Center and Its Surroundings and Assessment of Urban Heat Island | Sivas<br>Turkey<br>Asia          | Arid<br>(BSk)                                  | Landsat (TM, ETM+, & TIRS/OLI) | Inter-annual variations; LULC types; LULC patterns; Biophysical                                                    |
| 83                                                                  | Grigoraş and Urişescu 2019 | Land Use/Land Cover Changes Dynamics and Their Effects on Surface Urban Heat Island in Bucharest, Romania                                                  | Bucharest<br>Romania<br>Europe   | Continental<br>(Dfa)                           | Landsat (TM, ETM+, & TIRS/OLI) | Inter-annual variations; LULC types; LULC patterns; Biophysical                                                    |

|    |                            |                                                                                                                                                                                                       |                                  |                      |                                |                                                                                                  |
|----|----------------------------|-------------------------------------------------------------------------------------------------------------------------------------------------------------------------------------------------------|----------------------------------|----------------------|--------------------------------|--------------------------------------------------------------------------------------------------|
| 84 | Sahana et al.<br>2019      | Assessing land transformation and its relation with land surface temperature in Mumbai city, India using geospatial techniques                                                                        | Mumbai<br>India<br>Asia          | Tropical<br>(Am)     | Landsat (TM & TIRS/OLI)        | Inter-annual variations; Seasonal variations; LULC types; LULC patterns; Biophysical             |
| 85 | Chakraborti et al.<br>2019 | Assessing the dynamic relationship among land use pattern and land surface temperature: A spatial regression approach                                                                                 | Hyderabad<br>India<br>Asia       | Arid<br>(BWh)        | Landsat (ETM+ & TIRS/OLI)      | Seasonal variations; LULC types; LULC patterns; Landscape                                        |
| 86 | Huang and Wang<br>2019     | Investigating the effects of 3D urban morphology on the surface urban heat island effect in urban functional zones by using high-resolution remote sensing data: A case study of Wuhan, Central China | Wuhan<br>China<br>Asia           | Temperate<br>(Cfa)   | Landsat (TIRS/OLI)             | Inter-annual variations; LULC types; LULC patterns; Biophysical; Socioeconomic; Landscape        |
| 87 | Choudhury et al.<br>2019   | Assessment of land use land cover changes and its impact on variations of land surface temperature in Asansol-Durgapur Development Region                                                             | Durgapur<br>India<br>Asia        | Tropical<br>(Aw)     | Landsat (TM & TIRS/OLI)        | Inter-annual variations; Seasonal variations; LULC types; LULC patterns; Biophysical             |
| 88 | Miky<br>2019               | Remote sensing analysis for surface urban heat island detection over Jeddah, Saudi Arabia                                                                                                             | Jeddah<br>Saudi Arabia<br>Asia   | Arid<br>(BWh)        | Landsat (TIRS/OLI)<br>SPOT     | Inter-annual variations; Seasonal variations; LULC types; LULC patterns                          |
| 89 | Ye et al.<br>2019          | Characterization of Combined Effects of Urban Built-Up and Vegetated Areas on Long-Term Urban Heat Islands in Beijing                                                                                 | Beijing<br>China<br>Asia         | Continental<br>(Dwa) | Landsat (TM & TIRS/OLI)        | Inter-annual variations; LULC types; LULC patterns; Biophysical; Socioeconomic; Landscape        |
| 90 | Xiong et al.<br>2019       | Spatiotemporal influences of land use/cover changes on the heat island effect in rapid urbanization area                                                                                              | Multiple cities<br>China<br>Asia | Temperate<br>(Cfa)   | Landsat (TM & TIRS/OLI)        | Inter-annual variations; Seasonal variations; LULC types; LULC patterns; Biophysical; Topography |
| 91 | Eresanya et al.<br>2019    | Investigation of the changing patterns of the land use land cover over Osogbo and its environs                                                                                                        | Osogbo<br>Nigeria<br>Africa      | Tropical<br>(Aw)     | Landsat (TM, ETM+, & TIRS/OLI) | Inter-annual variations; LULC types; LULC patterns                                               |

|     |                                |                                                                                                                                                         |                                  |                    |                                |                                                                                      |
|-----|--------------------------------|---------------------------------------------------------------------------------------------------------------------------------------------------------|----------------------------------|--------------------|--------------------------------|--------------------------------------------------------------------------------------|
| 92  | Sultana and Satyanarayana 2020 | Assessment of urbanisation and urban heat island intensities using landsat imageries during 2000 – 2018 over a sub-tropical Indian City                 | Chandigarh<br>India<br>Asia      | Temperate<br>(Cwa) | Landsat (ETM+ & TIRS/OLI)      | Inter-annual variations; Seasonal variations; LULC types; LULC patterns; Biophysical |
| 93  | Khamchiangta and Dhakal 2020   | Time series analysis of land use and land cover changes related to urban heat island intensity: Case of Bangkok Metropolitan Area in Thailand           | Bangkok<br>Thailand<br>Asia      | Tropical<br>(Aw)   | Landsat (TM & ETM+)            | Inter-annual variations; LULC types; LULC patterns; Biophysical; Landscape           |
| 94  | Du et al. 2020                 | Analysis of the impact of land use on spatiotemporal patterns of surface urban heat island in rapid urbanization, a case study of Shanghai, China       | Shanghai<br>China<br>Asia        | Temperate<br>(Cfa) | Landsat (TM, ETM+, & TIRS/OLI) | Inter-annual variations; LULC types; LULC patterns; Biophysical                      |
| 95  | Wang et al. 2020               | Spatiotemporal analysis of land use/cover patterns and their relationship with land surface temperature in Nanjing, China                               | Nanjing<br>China<br>Asia         | Temperate<br>(Cfa) | Landsat (ETM+ & TIRS/OLI)      | Inter-annual variations; LULC types; LULC patterns; Biophysical                      |
| 96  | Imran and Mehmood 2020         | Analysis and mapping of present and future drivers of local urban climate using remote sensing: a case of Lahore, Pakistan                              | Lahore<br>Pakistan<br>Asia       | Tropical<br>(Aw)   | Landsat (TM, ETM+, & TIRS/OLI) | Inter-annual variations; LULC types; LULC patterns; Biophysical                      |
| 97  | Roy et al. 2020                | Examining the nexus between land surface temperature and urban growth in Chattogram Metropolitan Area of Bangladesh using long term Landsat series data | Chattogram<br>Bangladesh<br>Asia | Tropical<br>(Am)   | Landsat (TM & TIRS/OLI)        | Inter-annual variations; LULC types; LULC patterns; Biophysical; Landscape           |
| 98  | Khan et al. 2020               | Land-use/land-cover changes and its contribution to urban heat Island: A case study of Islamabad, Pakistan                                              | Islamabad<br>Pakistan<br>Asia    | Temperate<br>(Cwa) | Landsat (TM & TIRS/OLI)        | Inter-annual variations; LULC types; LULC patterns; Biophysical                      |
| 99  | Song et al. 2020               | Effects of green space patterns on urban thermal environment at multiple spatial-temporal scales                                                        | Hangzhou<br>China<br>Asia        | Temperate<br>(Cfa) | Landsat (TIRS/OLI)<br>SPOT     | Inter-annual variations; Seasonal variations; LULC types; LULC patterns; Landscape   |
| 100 | Athukorala and Murayama 2020   | Spatial variation of land use/cover composition and impact on surface urban heat island in a tropical sub-Saharan City of Accra, Ghana                  | Accra<br>Ghana<br>Africa         | Arid<br>(Bwh)      | Landsat (ETM+ & TIRS/OLI)      | Inter-annual variations; LULC types; LULC patterns                                   |

|     |                            |                                                                                                                                                                        |                                     |                       |                                |                                                                                                  |
|-----|----------------------------|------------------------------------------------------------------------------------------------------------------------------------------------------------------------|-------------------------------------|-----------------------|--------------------------------|--------------------------------------------------------------------------------------------------|
| 101 | Rizvi et al.<br>2020       | The effect of urbanization on the intensification of SUHIs: Analysis by LULC on Karachi                                                                                | Karachi<br>Pakistan<br>Asia         | Arid<br>(BWh)         | Landsat (TM & TIRS/OLI)        | Inter-annual variations; LULC types; LULC patterns                                               |
| 102 | Saleem et al.<br>2020      | Impact assessment of urban development patterns on land surface temperature by using remote sensing techniques: a case study of Lahore, Faisalabad and Multan district | Multiple cities<br>Pakistan<br>Asia | Arid<br>(BSh/BWh/BWh) | Landsat (TM)                   | Inter-annual variations; LULC types; LULC patterns; Biophysical                                  |
| 103 | Saha et al.<br>2020        | Multi-approach synergic investigation between land surface temperature and land-use land-cover                                                                         | Kolkata<br>India<br>Asia            | Tropical<br>(Aw)      | Landsat (TM, ETM+, & TIRS/OLI) | Inter-annual variations; LULC types; LULC patterns; Biophysical                                  |
| 104 | Dutta and Das<br>2020      | Exploring the Spatio-temporal pattern of regional heat island (RHI) in an urban agglomeration of secondary cities in Eastern India                                     | Malda<br>India<br>Asia              | Tropical<br>(Aw)      | Landsat (TM & TIRS/OLI)        | Inter-annual variations; LULC types; LULC patterns; Biophysical                                  |
| 105 | Pramanik and Punia<br>2020 | Land use/land cover change and surface urban heat island intensity: source–sink landscape-based study in Delhi, India                                                  | Delhi<br>India<br>Asia              | Arid<br>(BSh)         | Landsat (TM, ETM+, & TIRS/OLI) | Inter-annual variations; Day/Night variations; LULC types; LULC patterns; Biophysical; PDENS     |
| 106 | Siqi and Yuhong<br>2020    | Effects of land use and land cover pattern on urban temperature variations: A case study in Hong Kong                                                                  | Hong Kong<br>China<br>Asia          | Temperate<br>(Cwa)    | Landsat (TIRS/OLI)             | Inter-annual variations; Seasonal variations; LULC types; LULC patterns; Biophysical; Topography |
| 107 | Atasoy<br>2020             | Assessing the impacts of land-use/land-cover change on the development of urban heat island effects                                                                    | Osmaniye<br>Turkey<br>Asia          | Temperate<br>(Csa)    | Landsat (ETM+)                 | Inter-annual variations; LULC types; LULC patterns                                               |
| 108 | Gupta et al.<br>2020       | Spatio-temporal impact assessment of land use / land cover (LU-LC) change on land surface temperatures over Jaipur city in India                                       | Jaipur<br>India<br>Asia             | Arid<br>(BSh)         | Landsat (TM) MODIS             | Inter-annual variations; Seasonal variations; LULC types; LULC patterns                          |
| 109 | Li et al.<br>2020          | Examining Land Use/Land Cover Change and the Summertime Surface Urban Heat Island Effect in Fast-Growing Greater                                                       | Hefei<br>China<br>Asia              | Temperate<br>(Cfa)    | Landsat (TM & TIRS/OLI)        | Inter-annual variations; LULC types; LULC patterns; PDENS                                        |

---

**Hefei, China: Implications for Sustainable  
Land Development**

|     |                                            |                                                                                                                                                   |                        |               |                            |                                                                              |
|-----|--------------------------------------------|---------------------------------------------------------------------------------------------------------------------------------------------------|------------------------|---------------|----------------------------|------------------------------------------------------------------------------|
| 110 | <b>Kamali<br/>Maskooni et al.<br/>2020</b> | <b>Impact of spatiotemporal land-use and<br/>land-cover changes on surface urban heat<br/>islands in a semiarid region using Landsat<br/>data</b> | Shiraz<br>Iran<br>Asia | Arid<br>(BSh) | Landsat (TM<br>& TIRS/OLI) | Inter-annual variations; LULC<br>types; LULC patterns;<br>Biophysical; PDENS |
|-----|--------------------------------------------|---------------------------------------------------------------------------------------------------------------------------------------------------|------------------------|---------------|----------------------------|------------------------------------------------------------------------------|

---
